# Supplementary material for: NixRh1−x bimetallic alloy nanofibers as a pH-universal electrocatalyst for the hydrogen evolution reaction: the synthetic strategy and fascinating electroactivity
Source: Royal Society of Chemistry journal article supplement (doi:10.1039/d0ta02005b), 2020-01-01
Supplement: d0ta02005b1.pdf [file d0ta02005b1.pdf]

**Supporting Information**

**Ni<sub>x</sub>Rh<sub>1-x</sub> Bimetallic Alloy Nanofibers**  
**as pH-Universal Electrocatalyst for Hydrogen Evolution Reaction:**  
**The Synthetic Strategy and Fascinating Electroactivity**

Dasol Jin<sup>1</sup>, Areum Yu<sup>1</sup>, Youngmi Lee\*, Myung Hwa Kim\*, and Chongmok Lee\*

Department of Chemistry & Nanoscience, Ewha Womans University, Seoul 03760, Korea

<sup>1</sup>Authors contribute this work equally.

\*Correspondence: [youngmilee@ewha.ac.kr](mailto:youngmilee@ewha.ac.kr) (Y.L.), [myungkim@ewha.ac.kr](mailto:myungkim@ewha.ac.kr) (M.H.K.),  
[cmlee@ewha.ac.kr](mailto:cmlee@ewha.ac.kr) (C.L.)

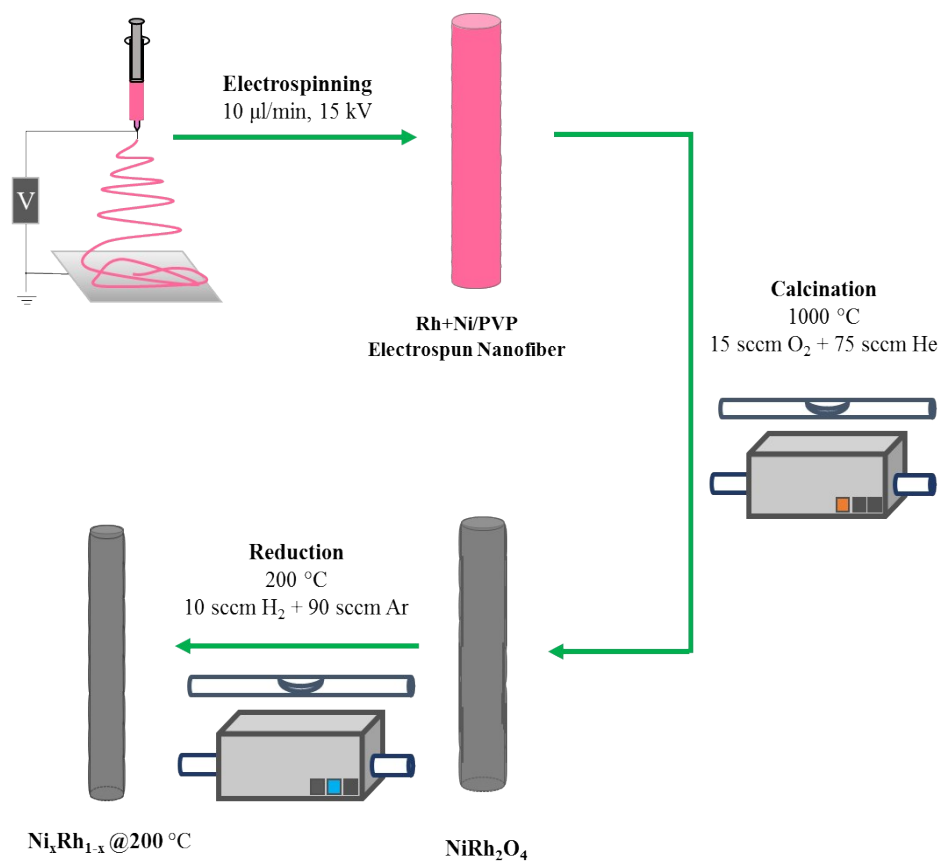

**Scheme S1.** Schematic illustration for the synthesis of  $\text{Ni}_x\text{Rh}_{1-x}$  @ 200 °C.

---

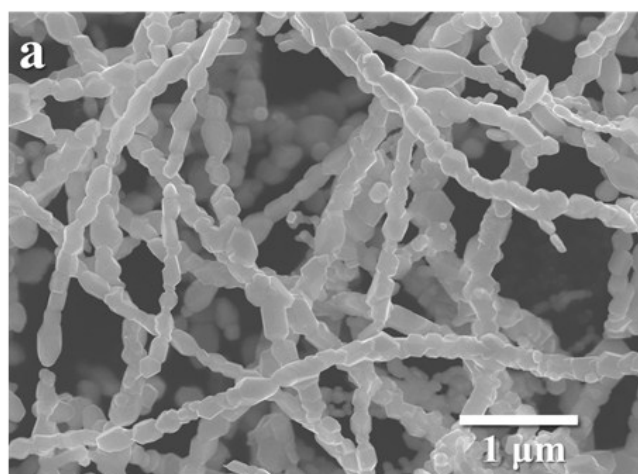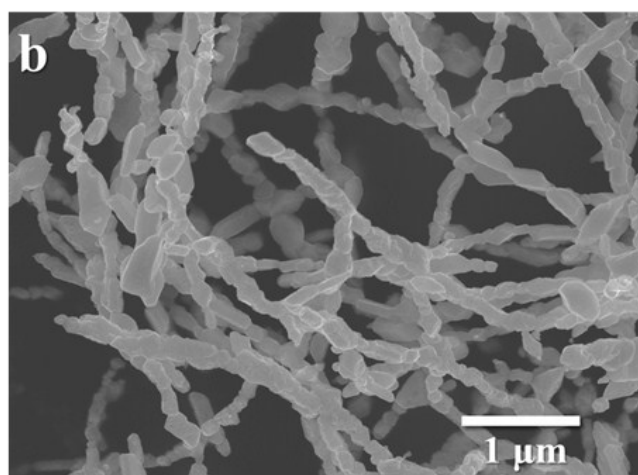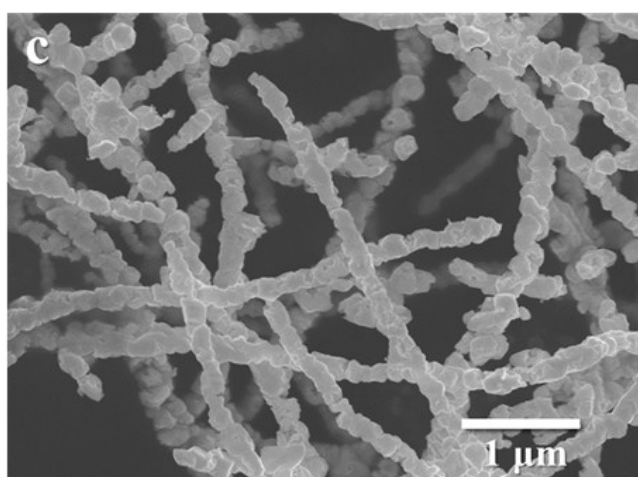

**Figure S1.** SEM images of  $\text{Ni}_x\text{Rh}_{1-x}$  @T °C after being thermally annealed for 2 h under flowing  $\text{H}_2$  and Ar at diverse annealing temperatures of (a) 100 °C, (b) 200 °C and (c) 300 °C.

---

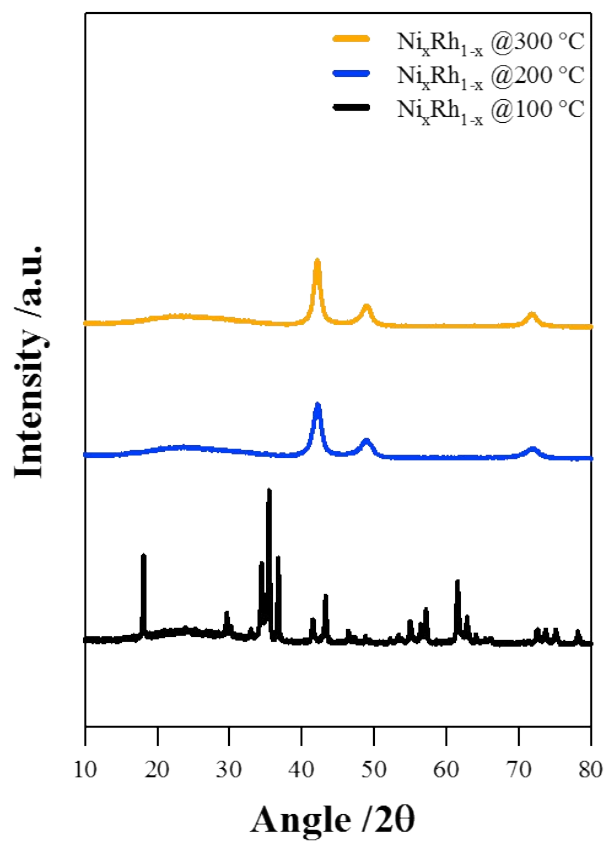

**Figure S2.** XRD patterns of  $\text{Ni}_x\text{Rh}_{1-x}$  @T °C after being thermally annealed for 2 h under flowing  $\text{H}_2$  and Ar at diverse annealing temperatures.

---

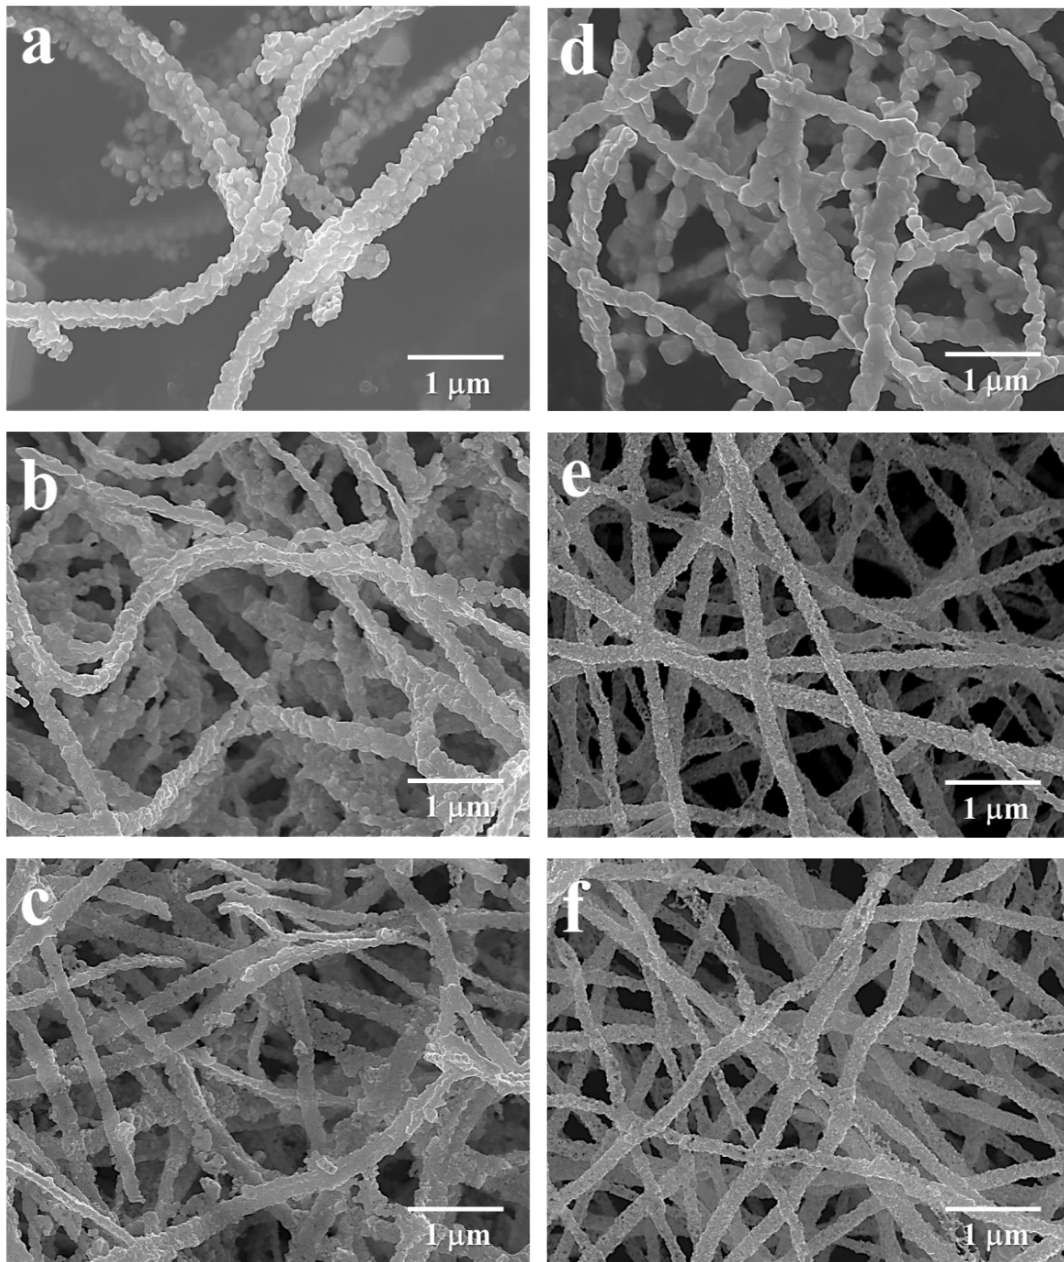

**Figure S3.** SEM images of NiRh<sub>2</sub>O<sub>4</sub>/NiO nanofibers (a) before, (b) after the reduction at 200 °C and (c) at 300 °C. SEM images of Rh<sub>2</sub>O<sub>3</sub>/NiO nanofibers (d) before, (e) after the reduction at 200 °C and (f) at 300 °C.

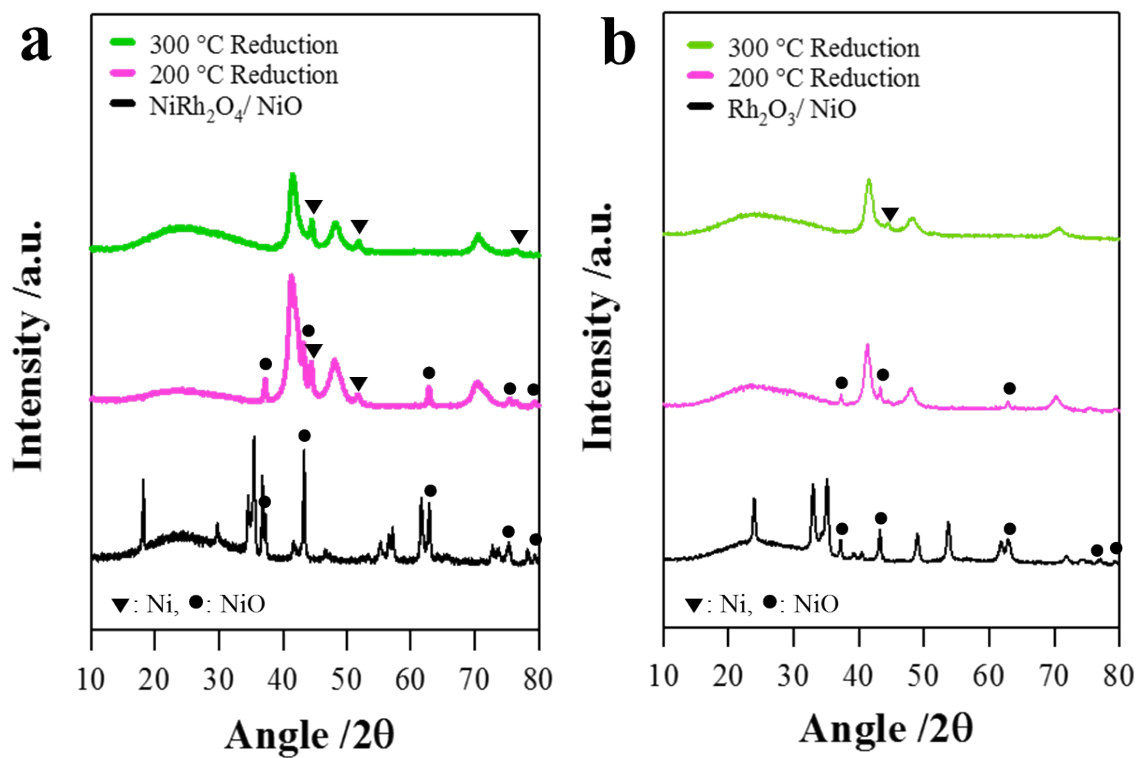

**Figure S4.** XRD patterns of (a) NiRh<sub>2</sub>O<sub>4</sub>/NiO and (b) Rh<sub>2</sub>O<sub>3</sub>/NiO nanofibers before (black line) and after (pink and green lines) the thermal hydrogen reduction.

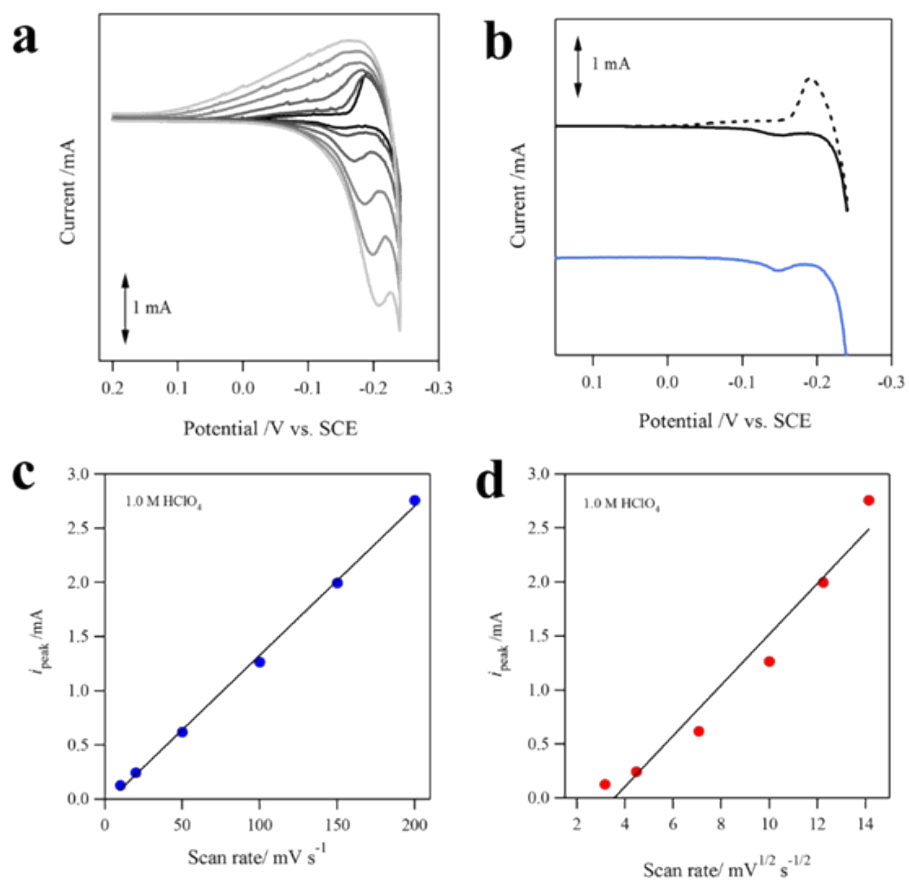

**Figure S5.** (a) Cyclic voltammograms (CV) of  $\text{Ni}_x\text{Rh}_{1-x}$  @200 °C in 1.0 M  $\text{HClO}_4$  at various scan rates of 10, 20, 50, 100, 150 and 200  $\text{mV s}^{-1}$ . (b) CV and LSV curves of  $\text{Ni}_x\text{Rh}_{1-x}$  @200 °C in 1.0 M  $\text{HClO}_4$  at 10  $\text{mV s}^{-1}$ . Plots of the cathodic peak current ( $i_{\text{pc}}$  around -0.15 V) vs. (c) scan rate and (d) scan rate<sup>1/2</sup>, respectively.

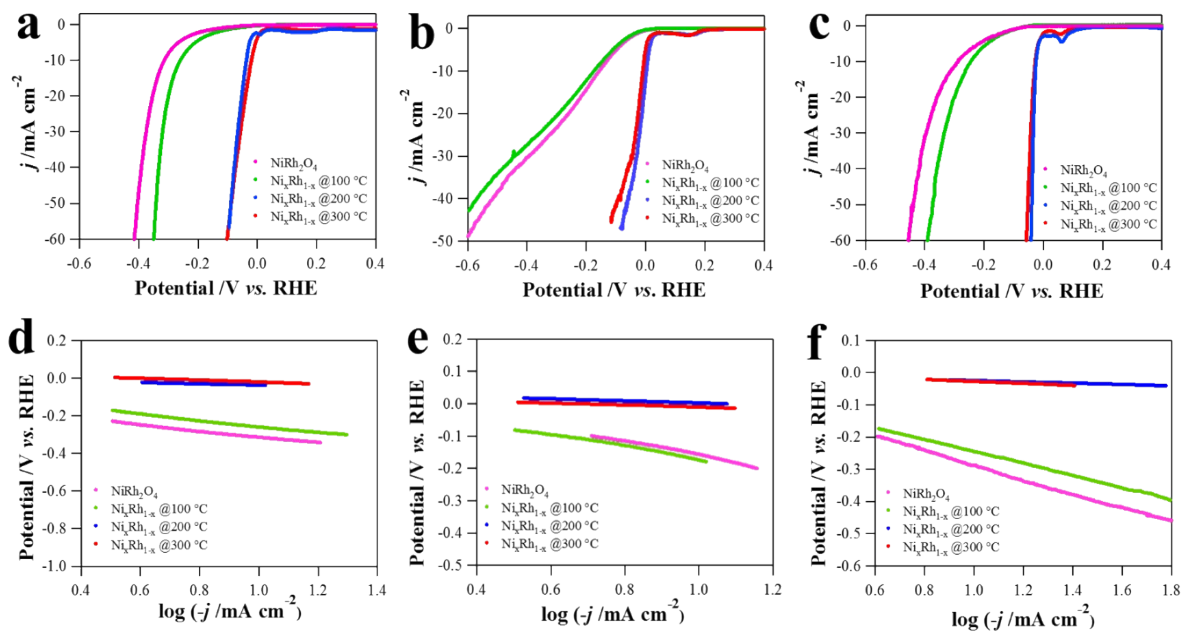

**Figure S6.** Polarization curves with  $iR$  compensation obtained using GC electrodes modified with NiRh<sub>2</sub>O<sub>4</sub>, NiRh<sub>1-x</sub> @100 °C, NiRh<sub>1-x</sub> @200 °C and NiRh<sub>1-x</sub> @300 °C in N<sub>2</sub>-saturated aqueous solution of (a) 1.0 M NaOH, (b) 1.0 M PBS (pH 7.4) and (c) 1.0 M HClO<sub>4</sub>. Scan rate of 10 mV s<sup>-1</sup> and a rotating speed of 1600 rpm. The corresponding (d,e,f) Tafel plots for the HER obtained the RDE voltammograms shown in (a,b,c) respectively.



---

**Table S1. Comparison of HER activities of the synthesized nanofibers in 1.0 M NaOH, 1.0 M PBS and 1.0 M HClO<sub>4</sub> aqueous media.**

| Catalyst                                  | Solution                | Potential at 10 mA cm <sup>-2</sup><br>(mV vs. RHE) | Tafel Slope<br>(mV dec <sup>-1</sup> ) |
|-------------------------------------------|-------------------------|-----------------------------------------------------|----------------------------------------|
| Ni <sub>x</sub> Rh <sub>1-x</sub> @100 °C | 1.0 M NaOH              | -260                                                | -164.4                                 |
|                                           | 1.0 M PBS               | -174                                                | -189.8                                 |
|                                           | 1.0 M HClO <sub>4</sub> | -245                                                | -186.2                                 |
| Ni <sub>x</sub> Rh <sub>1-x</sub> @200 °C | 1.0 M NaOH              | -37                                                 | -36.7                                  |
|                                           | 1.0 M PBS               | -9.4                                                | -31.4                                  |
|                                           | 1.0 M HClO <sub>4</sub> | -24                                                 | -29.6                                  |
| Ni <sub>x</sub> Rh <sub>1-x</sub> @300 °C | 1.0 M NaOH              | -30                                                 | -49.5                                  |
|                                           | 1.0 M PBS               | -10.4                                               | -30                                    |
|                                           | 1.0 M HClO <sub>4</sub> | -25                                                 | -31.2                                  |
| NiRh <sub>2</sub> O <sub>4</sub>          | 1.0 M NaOH              | -316                                                | -161.8                                 |
|                                           | 1.0 M PBS               | -156                                                | -224.4                                 |
|                                           | 1.0 M HClO <sub>4</sub> | -288                                                | -221.7                                 |

---

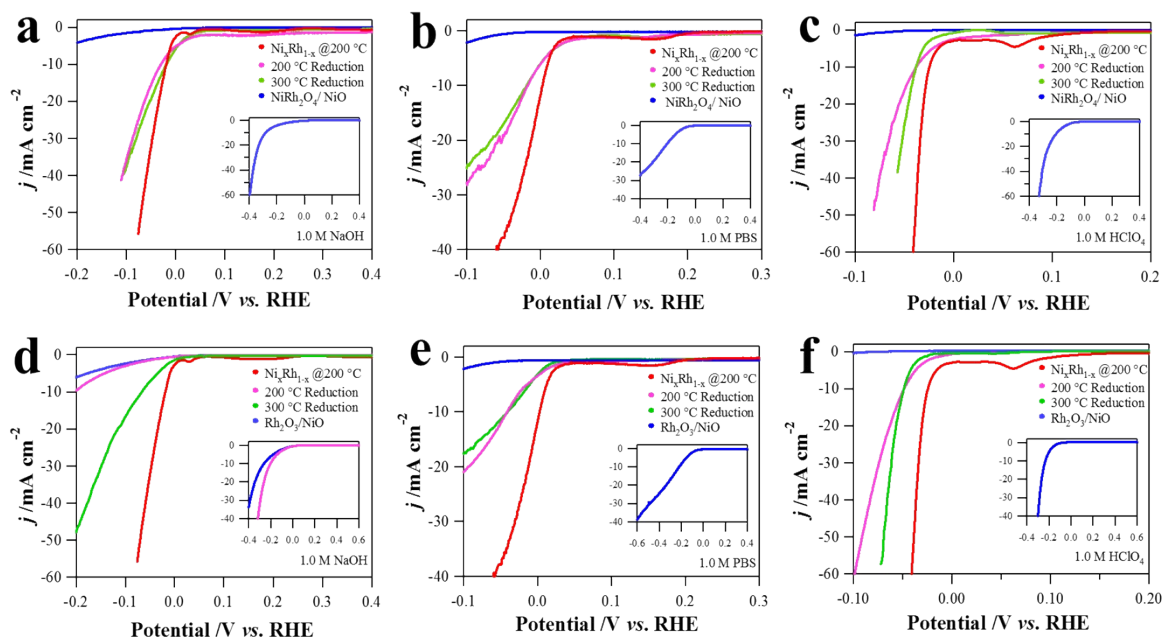

**Figure S7.** RDE voltammograms of the heterogeneous materials before and after thermal hydrogen reduction and that of  $\text{Ni}_x\text{Rh}_{1-x}$  @200 °C obtained in 1.0 M NaOH, 1.0 M PBS (pH 7.4) and 1.0 M  $\text{HClO}_4$  with a rotation rate of 1600 rpm. Precursor materials for the thermal hydrogen reduction are (a,b,c)  $\text{NiRh}_2\text{O}_4/\text{NiO}$  and (d,e,f)  $\text{Rh}_2\text{O}_3/\text{NiO}$ . Insets show the polarization curves in wider potential ranges for less active materials.

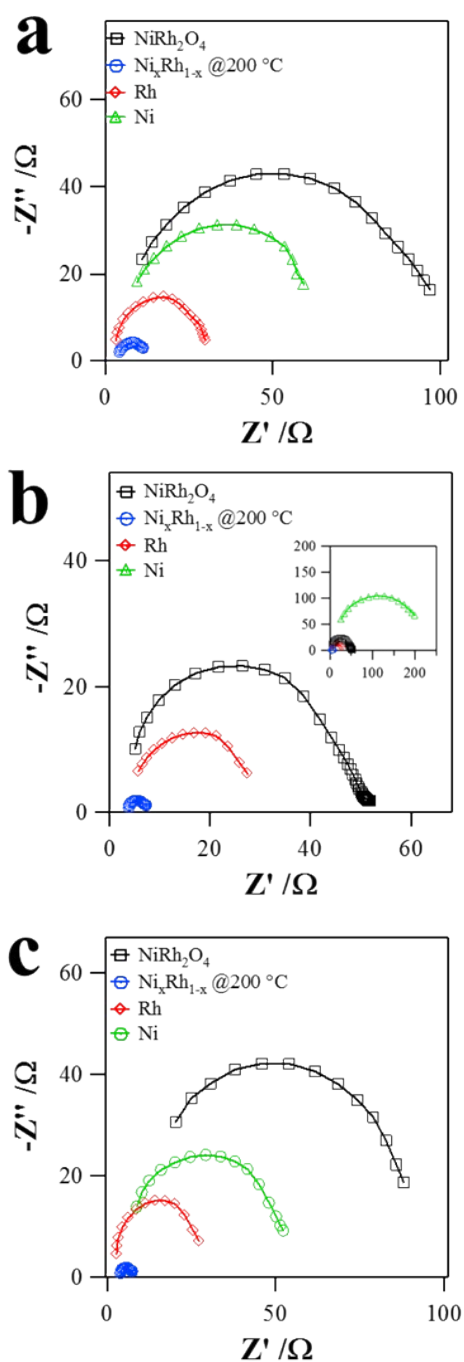

**Figure S8.** EIS study for the nanofibers of  $\text{NiRh}_2\text{O}_4$ ,  $\text{Ni}_x\text{Rh}_{1-x}$  @200 °C, pure Rh and pure Ni. The Nyquist plots measured in (a) 1.0 M NaOH, (b) 1.0 M PBS (pH 7.4) and (c) 1.0 M  $\text{HClO}_4$  aqueous solution at overpotential of 0.1 V in the frequency range from 1 Hz to 10 kHz.

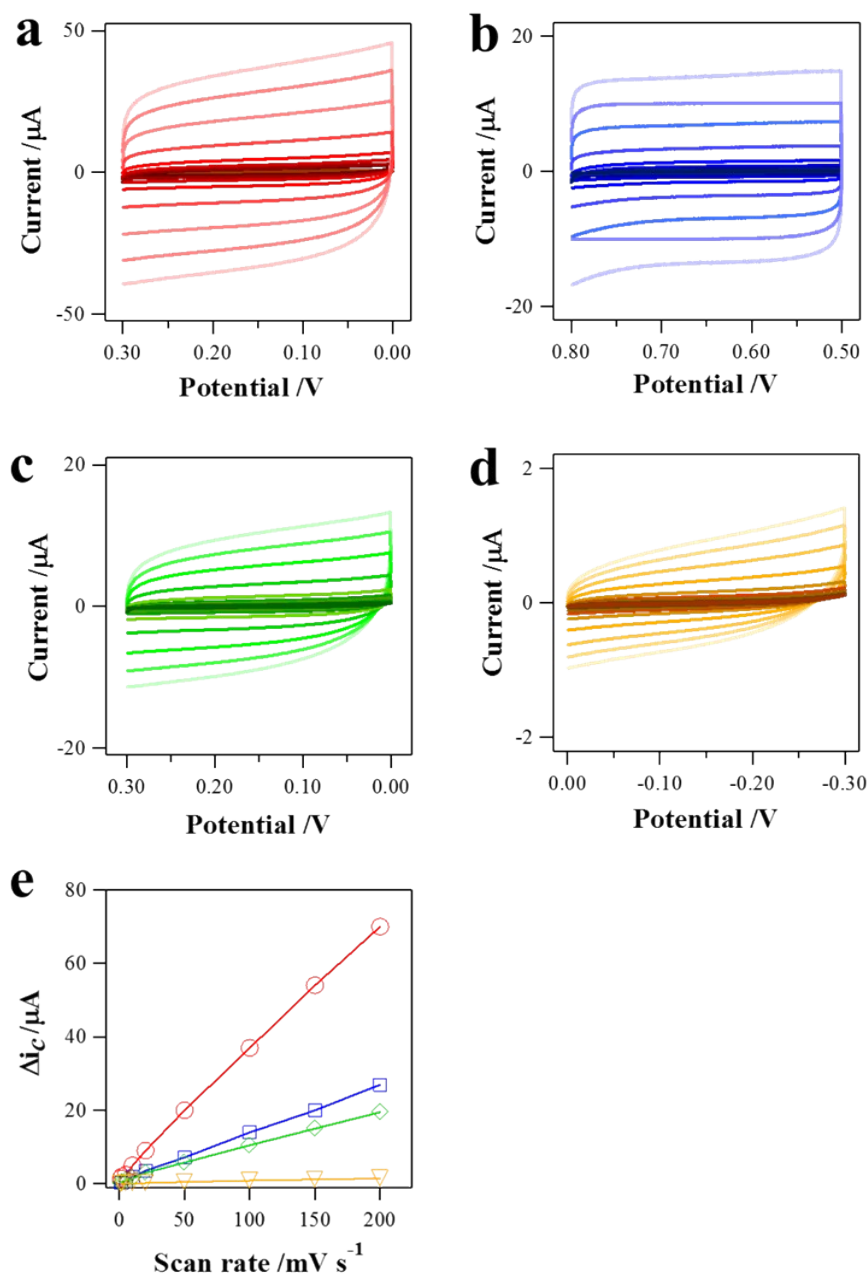

**Figure S9.** Cyclic voltammograms of (a)  $\text{Ni}_x\text{Rh}_{1-x}$  @ $200^\circ\text{C}$ , (b)  $\text{NiRh}_2\text{O}_4$ , (c) Rh and (d) Ni nanomaterials obtained in 1.0 M KCl solution at various scan rates of 1, 2, 5, 10, 20, 50, 100, 150, and 200  $\text{mV s}^{-1}$  with a potential range of 0.3 V. (e) Plots of absolute charging current differences ( $\Delta i_c$ ) vs scan rate:  $\text{Ni}_x\text{Rh}_{1-x}$  @ $200^\circ\text{C}$  (o) at 0.15 V,  $\text{NiRh}_2\text{O}_4$  ( $\square$ ) at 0.65 V, pure Rh ( $\diamond$ ) at 0.15 V and pure Ni ( $\nabla$ ) at  $-0.15$  V. Potential values are versus SCE.

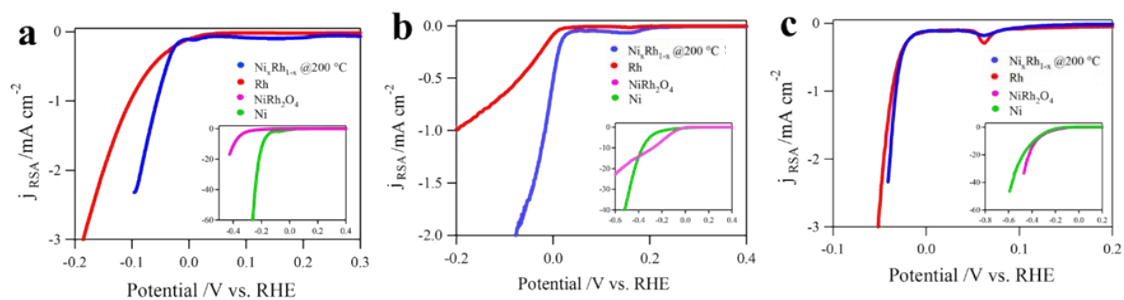

**Figure S10.** RDE polarization curves normalized by the corresponding electrochemical active surface area (ESA) for Ni<sub>x</sub>Rh<sub>1-x</sub>@200 °C, NiRh<sub>2</sub>O<sub>4</sub>, pure Rh and pure Ni in N<sub>2</sub>-saturated aqueous solution of (a) 1.0 M NaOH, (b) 1.0 M PBS and (c) 1.0 M HClO<sub>4</sub>, respectively. For estimating ESAs, the slopes in Figure S9 and typical specific capacitance ( $C_s$ ) of 35 μF cm<sup>-2</sup> were used.
